# Supplementary material
Source: PubMed Central journal article supplement (PMC4159220)
Supplement: ct5005214_si_001.pdf [file ct5005214_si_001.pdf]

## Supporting Information

### Use of Broken-Symmetry Density Functional Theory to Characterize the IspH Oxidized State: Implications for IspH Mechanism and Inhibition

*Patrick G. Blachly,<sup>1</sup> Gregory M. Sandala,<sup>2</sup> Debra Ann Giammona,<sup>3</sup> Tiqing Liu,<sup>4</sup> Donald Bashford,<sup>3</sup> J. Andrew McCammon,<sup>1,5,6</sup> Louis Noodleman<sup>7,\*</sup>*

<sup>1</sup> Department of Chemistry and Biochemistry, University of California San Diego, La Jolla, CA 92093-0365, USA

<sup>2</sup> Department of Chemistry and Biochemistry, Mount Allison University, 63C York Street, Sackville, New Brunswick E4L 1G8, Canada

<sup>3</sup> Department of Structural Biology, St. Jude Children's Research Hospital, 262 Danny Thomas Place, Memphis, TN 38105, USA

<sup>4</sup> Skaggs School of Pharmacy and Pharmaceutical Sciences, University of California San Diego, La Jolla, CA 92093-0365, USA

<sup>5</sup> Howard Hughes Medical Institute, University of California San Diego, La Jolla, CA 92093-0365, USA

<sup>6</sup> Department of Pharmacology, University of California San Diego, La Jolla, CA 92093-0365, USA

<sup>7</sup> Department of Integrative Structural and Computational Biology, TPC15, The Scripps Research Institute, 10550 North Torrey Pines Road, La Jolla, CA 92037, USA

\*Correspondence to:

Louis Noodleman  
Department of Integrative Structural and Computational Biology  
The Scripps Research Institute  
TPC15, 10550 North Torrey Pines Road  
La Jolla, CA 92037  
858-784-2840 (phone)  
lou@scripps.edu

**Table S1.** Relative energies (kcal mol<sup>-1</sup>) of the four valence isomers considered in this study, computed using DFT/COSMO and DFT/SCRF methods. The net spins on the different Fe atoms are given, relative to the Fe atom numbering in Figure 2B (e.g. βααβ indicates that Fe2 and Fe3 are each net spin α, while Fe1 and Fe4 are each net spin β). The energies of the lowest-energy states are set to zero and are indicated with bold-type font. The energy values of the lowest-energy valence isomers correspond to the relative energies given in Table 4A and 4C ( $\Delta E_{\text{Tot,COSMO,pH=7}}$  and  $\Delta E_{\text{Tot,SCRF,pH=7}}$ ).

|                                                 | Relative energies (kcal mol <sup>-1</sup> ) |            |
|-------------------------------------------------|---------------------------------------------|------------|
|                                                 | DFT/COSMO                                   | DFT/SCRF   |
| <b>RO<sup>-</sup>P<sup>-</sup>E<sup>H</sup></b> |                                             |            |
| βαβα                                            | 11.8                                        | 5.7        |
| βααβ                                            | 7.9                                         | <b>0.0</b> |
| αββα                                            | 7.9                                         | <b>0.0</b> |
| ααββ                                            | 12.6                                        | 5.2        |
| <b>RO<sup>-</sup>P<sup>H</sup>E<sup>H</sup></b> |                                             |            |
| βαβα                                            | 3.8                                         | 7.1        |
| βααβ                                            | 0.3                                         | 2.2        |
| αββα                                            | <b>0.0</b>                                  | 2.4        |
| ααββ                                            | 3.9                                         | 8.1        |
| <b>RO<sup>H</sup>P<sup>-</sup>E<sup>-</sup></b> |                                             |            |
| βαβα                                            | 15.4                                        | 7.7        |
| βααβ                                            | 8.4                                         | <b>0.0</b> |
| αββα                                            | 10.5                                        | 0.6        |
| ααββ                                            | 13.3                                        | 4.6        |
| <b>RO<sup>H</sup>P<sup>H</sup>E<sup>-</sup></b> |                                             |            |
| βαβα                                            | 10.4                                        | 11.7       |
| βααβ                                            | 5.3                                         | 6.1        |
| αββα                                            | 9.5                                         | 10.2       |
| ααββ                                            | 12.2                                        | 13.4       |
| <b>RO<sup>H</sup>P<sup>-</sup>E<sup>H</sup></b> |                                             |            |
| βαβα                                            | 6.3                                         | 9.2        |
| βααβ                                            | 2.9                                         | 5.5        |
| αββα                                            | 2.9                                         | 5.5        |
| ααββ                                            | 8.0                                         | 10.3       |
| <b>RO<sup>H</sup>P<sup>H</sup>E<sup>H</sup></b> |                                             |            |
| βαβα                                            | 2.1                                         | 17.1       |
| βααβ                                            | <b>0.0</b>                                  | 13.3       |
| αββα                                            | <b>0.0</b>                                  | 13.3       |
| ααββ                                            | 4.9                                         | 18.8       |

**Table S2.** Tabulation of isomer shifts (given in  $\text{mm s}^{-1}$ ) for different protonation state conformers computed using the DFT/COSMO method and compared with experiment.<sup>1</sup> The error with respect to the experimental values is given as mean absolute error (MAE).

|            | Exp  | $\text{RO}^- \text{P}^- \text{E}^{\text{H}}$ | $\text{RO}^- \text{P}^{\text{H}} \text{E}^{\text{H}}$ | $\text{RO}^{\text{H}} \text{P}^- \text{E}^-$ | $\text{RO}^{\text{H}} \text{P}^{\text{H}} \text{E}^-$ | $\text{RO}^{\text{H}} \text{P}^- \text{E}^{\text{H}}$ | $\text{RO}^{\text{H}} \text{P}^{\text{H}} \text{E}^{\text{H}}$ |
|------------|------|----------------------------------------------|-------------------------------------------------------|----------------------------------------------|-------------------------------------------------------|-------------------------------------------------------|----------------------------------------------------------------|
| <b>Fe1</b> | 0.64 | 0.44                                         | 0.44                                                  | 0.54                                         | 0.53                                                  | 0.53                                                  | 0.54                                                           |
| <b>Fe2</b> | 0.38 | 0.42                                         | 0.42                                                  | 0.39                                         | 0.38                                                  | 0.38                                                  | 0.38                                                           |
| <b>Fe3</b> | 0.42 | 0.43                                         | 0.42                                                  | 0.41                                         | 0.40                                                  | 0.40                                                  | 0.40                                                           |
| <b>Fe4</b> | 0.42 | 0.43                                         | 0.42                                                  | 0.41                                         | 0.40                                                  | 0.40                                                  | 0.39                                                           |
| <b>AVG</b> | 0.47 | 0.43                                         | 0.43                                                  | 0.44                                         | 0.43                                                  | 0.43                                                  | 0.43                                                           |
| <b>MAE</b> | -    | 0.07                                         | 0.06                                                  | 0.03                                         | 0.04                                                  | 0.04                                                  | 0.04                                                           |

<sup>1</sup> Ahrens-Botzong, A.; Janthawornpong, K.; Wolny, J. A.; Tambou, E. N.; Rohmer, M.; Krasutsky, S.; Poulter, C. D.; Schunemann, V.; Seemann, M. *Angew Chem Int Edit* **2011**, *50*, 11976.

**Table S3.** Tabulation of quadrupole splittings (given in  $\text{mm s}^{-1}$ ) for different protonation state conformers computed using the DFT/COSMO method and compared with experiment.<sup>2</sup> The error with respect to the experimental values is given as mean absolute error (MAE).

|            | Exp  | $\text{RO}^- \text{P}^- \text{E}^{\text{H}}$ | $\text{RO}^- \text{P}^{\text{H}} \text{E}^{\text{H}}$ | $\text{RO}^{\text{H}} \text{P}^- \text{E}^-$ | $\text{RO}^{\text{H}} \text{P}^{\text{H}} \text{E}^-$ | $\text{RO}^{\text{H}} \text{P}^- \text{E}^{\text{H}}$ | $\text{RO}^{\text{H}} \text{P}^{\text{H}} \text{E}^{\text{H}}$ |
|------------|------|----------------------------------------------|-------------------------------------------------------|----------------------------------------------|-------------------------------------------------------|-------------------------------------------------------|----------------------------------------------------------------|
| <b>Fe1</b> | 1.22 | -0.64                                        | -0.66                                                 | 0.93                                         | 0.97                                                  | 1.04                                                  | 1.12                                                           |
| <b>Fe2</b> | 0.92 | 1.03                                         | 1.03                                                  | 1.11                                         | 1.08                                                  | 1.18                                                  | 1.17                                                           |
| <b>Fe3</b> | 1.33 | 1.10                                         | 1.10                                                  | 1.16                                         | 1.17                                                  | 1.26                                                  | 1.26                                                           |
| <b>Fe4</b> | 1.33 | 0.88                                         | 0.83                                                  | 0.65                                         | 0.61                                                  | 0.53                                                  | 0.52                                                           |
| <b>AVG</b> | 1.21 | 0.91                                         | 0.91                                                  | 0.96                                         | 0.96                                                  | 1.00                                                  | 1.02                                                           |
| <b>MAE</b> | -    | 0.34                                         | 0.35                                                  | 0.33                                         | 0.32                                                  | 0.33                                                  | 0.31                                                           |

<sup>2</sup> Ahrens-Botzong, A.; Janthawornpong, K.; Wolny, J. A.; Tambou, E. N.; Rohmer, M.; Krasutsky, S.; Poulter, C. D.; Schunemann, V.; Seemann, M. *Angew Chem Int Edit* **2011**, *50*, 11976.

**Figure S1.** Superposition of the geometry optimized (A) RO-P-E<sup>H</sup> and (B) RO<sup>H</sup>P-E<sup>-</sup> states (each represented by the ball and stick format) onto the [4Fe-4S] IspH:HMBPP crystal structure (licorice).<sup>3</sup>

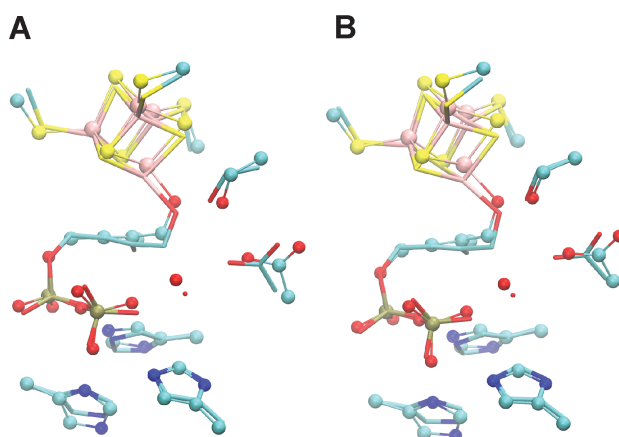

---

<sup>3</sup> Grawert, T.; Span, I.; Eisenreich, W.; Rohdich, F.; Eppinger, J.; Bacher, A.; Groll, M. *P Natl Acad Sci USA* **2010**, *107*, 1077.

**Text S1.** Coordinate file (xyz format) for the lowest-energy RO-P-E<sup>H</sup> state as computed from a DFT/SCRF single point energy calculation following geometry optimization of the active site quantum cluster at the OLYP/TZP level of theory. This low-energy state corresponds to a broken symmetry (BS) state where Fe1, Fe2, Fe3 and Fe4 (as numbered in Fig. 2B) have net spins of  $\beta$ ,  $\alpha$ ,  $\alpha$  and  $\beta$ , respectively.

203

0.0000

|    |               |              |              |
|----|---------------|--------------|--------------|
| Fe | -36.890346779 | -0.094277390 | 10.800501781 |
| Fe | -38.004529562 | -2.354695182 | 9.545363495  |
| Fe | -37.976574231 | 0.100055981  | 8.274356649  |
| Fe | -35.620000053 | -1.265912134 | 8.658972766  |
| S  | -39.078830368 | -0.402777995 | 10.261798826 |
| S  | -36.103905272 | -2.305868371 | 10.676770511 |
| S  | -36.021446848 | 1.008317599  | 8.881313436  |
| S  | -37.309952082 | -1.962015724 | 7.297888211  |
| S  | -39.145960012 | -4.322316737 | 9.918952819  |
| C  | -40.429904238 | -4.528045674 | 8.618514918  |
| H  | -40.087000000 | -5.237000000 | 7.860000000  |
| H  | -41.341989733 | -4.917731385 | 9.079386572  |
| H  | -40.659447462 | -3.574008167 | 8.139245632  |
| S  | -33.343383840 | -1.636816294 | 8.397979105  |
| C  | -32.776576579 | -1.182705617 | 10.093567307 |
| H  | -31.801000000 | -1.623000000 | 10.285000000 |
| H  | -32.718907165 | -0.096720934 | 10.201624859 |
| H  | -33.475368014 | -1.573872340 | 10.832237040 |
| S  | -39.415661605 | 1.465562070  | 7.083054780  |
| C  | -38.296298618 | 2.757487013  | 6.397401599  |
| H  | -38.869000000 | 3.673000000  | 6.263000000  |
| H  | -37.478249584 | 2.953684345  | 7.091088317  |
| H  | -37.886447579 | 2.440735610  | 5.434806556  |
| O  | -36.175911803 | 0.985022465  | 12.179295933 |
| C  | -36.502932475 | 0.738726979  | 13.544816750 |
| H  | -37.402740895 | 1.296972831  | 13.822472906 |
| H  | -35.674212428 | 1.130386096  | 14.158522581 |
| C  | -36.724690938 | -0.730086154 | 13.867283452 |
| C  | -37.994079151 | -1.166009346 | 13.940850778 |
| H  | -38.791117490 | -0.439625280 | 13.791769542 |
| C  | -35.492206482 | -1.583904355 | 14.065440572 |
| H  | -34.675531103 | -1.238479735 | 13.423589822 |

|   |               |              |              |
|---|---------------|--------------|--------------|
| H | -35.137586209 | -1.510246561 | 15.100638251 |
| H | -35.658329092 | -2.640651730 | 13.844819315 |
| C | -38.491822871 | -2.561303608 | 14.159814946 |
| H | -37.752980221 | -3.215477117 | 14.627719131 |
| H | -38.788716925 | -3.008757607 | 13.204552414 |
| O | -39.719905684 | -2.590517646 | 14.946710338 |
| P | -39.672005775 | -2.440374868 | 16.562830455 |
| O | -38.494952636 | -3.264093742 | 17.109711946 |
| O | -41.061021879 | -2.800329624 | 17.044179385 |
| O | -39.252979276 | -0.925959750 | 16.900872946 |
| P | -39.922742151 | 0.644227086  | 16.863498629 |
| O | -38.774164651 | 1.509883242  | 16.391607584 |
| O | -41.190068106 | 0.611432937  | 16.031893685 |
| O | -40.209041487 | 0.868443809  | 18.403346034 |
| C | -35.064000000 | -5.724000000 | 10.267000000 |
| O | -33.945281477 | -6.167444290 | 10.596103317 |
| H | -35.163629796 | -4.792852621 | 9.693090509  |
| N | -36.233686682 | -6.313417521 | 10.540989496 |
| H | -37.109354138 | -5.865555393 | 10.279273468 |
| H | -36.262767851 | -7.165289241 | 11.087441216 |
| C | -37.835138038 | -5.656484371 | 19.807042503 |
| H | -37.109080514 | -5.833268038 | 18.993092340 |
| O | -37.797569395 | -6.337881899 | 20.854069454 |
| N | -38.691948239 | -4.671428864 | 19.518654473 |
| H | -38.632488974 | -4.236839392 | 18.583894611 |
| C | -39.795000000 | -4.261000000 | 20.371000000 |
| H | -39.563808828 | -4.559809310 | 21.396053892 |
| H | -40.697495286 | -4.816851656 | 20.086139569 |
| C | -40.148588840 | -2.775516054 | 20.300755453 |
| H | -40.430066405 | -2.517284862 | 19.279685264 |
| H | -41.052358013 | -2.654926478 | 20.910692093 |
| C | -39.112843014 | -1.819414334 | 20.802537219 |
| N | -38.980552662 | -0.528348721 | 20.310737740 |
| H | -39.507811098 | -0.053033954 | 19.495646720 |
| C | -38.028927396 | 0.104835563  | 20.996649158 |
| H | -37.708310050 | 1.123076282  | 20.845459797 |
| N | -37.541522023 | -0.735996526 | 21.911675616 |
| H | -36.814926946 | -0.512271738 | 22.579025367 |
| C | -38.195543239 | -1.940483902 | 21.816790900 |
| H | -37.957240848 | -2.763382397 | 22.472747928 |
| C | -32.924000000 | 0.447000000  | 16.553000000 |
| H | -32.181741103 | 1.248494863  | 16.460383929 |
| H | -32.395982529 | -0.507787896 | 16.459626007 |
| H | -33.625665788 | 0.534909625  | 15.720450161 |
| C | -33.646976172 | 0.554918022  | 17.905732081 |
| H | -32.917228268 | 0.546144356  | 18.723261672 |

|   |               |              |              |
|---|---------------|--------------|--------------|
| H | -34.179915226 | 1.507917585  | 17.968700628 |
| C | -34.624823239 | -0.555956924 | 18.097196150 |
| N | -34.263509013 | -1.792442136 | 18.599536468 |
| H | -33.363170785 | -2.034470905 | 18.995484262 |
| C | -35.289966012 | -2.644521491 | 18.497701610 |
| H | -35.271655778 | -3.675596057 | 18.811301094 |
| N | -36.310437402 | -1.991805573 | 17.948437652 |
| H | -37.226806190 | -2.444530805 | 17.640528666 |
| C | -35.929129924 | -0.693459033 | 17.696006056 |
| H | -36.603478563 | 0.007555581  | 17.224718705 |
| C | -30.321000000 | 1.083000000  | 7.036000000  |
| H | -29.973534570 | 0.124120794  | 7.459547932  |
| O | -29.515388347 | 1.910344780  | 6.568113901  |
| N | -31.649067233 | 1.233407065  | 7.089839597  |
| H | -32.236978732 | 0.472451283  | 7.430183402  |
| H | -32.085056075 | 2.059779244  | 6.699759557  |
| C | -36.911000000 | 6.089000000  | 22.221000000 |
| H | -36.799252287 | 7.026997719  | 22.778269629 |
| H | -37.263465076 | 5.321641180  | 22.920701935 |
| H | -35.919780331 | 5.790694514  | 21.866229475 |
| C | -37.891991028 | 6.267918743  | 21.055923494 |
| H | -38.865257223 | 6.593123748  | 21.440841964 |
| H | -37.529106680 | 7.077305101  | 20.407055634 |
| C | -38.087490655 | 5.029218687  | 20.233082755 |
| N | -37.063146621 | 4.474263023  | 19.485542033 |
| C | -37.589880774 | 3.412265020  | 18.889851195 |
| H | -37.090180666 | 2.755759762  | 18.193128440 |
| N | -38.888905208 | 3.243612727  | 19.215202738 |
| H | -39.471156601 | 2.458600501  | 18.875369271 |
| C | -39.227274585 | 4.266190308  | 20.073342478 |
| H | -40.222253559 | 4.365279227  | 20.487123713 |
| C | -33.593000000 | 4.997000000  | 17.938000000 |
| H | -32.696013016 | 4.421901016  | 17.684449718 |
| H | -33.245844701 | 6.015475473  | 18.165568740 |
| N | -34.176504052 | 4.418106409  | 19.142336234 |
| H | -35.198513824 | 4.509693628  | 19.295120538 |
| C | -33.448957773 | 3.934983238  | 20.155217232 |
| H | -34.073486116 | 3.586764052  | 20.996677859 |
| O | -32.203265032 | 3.847585412  | 20.205520148 |
| C | -34.543614252 | 5.037845144  | 16.749137356 |
| H | -34.797877020 | 4.021031800  | 16.434695652 |
| H | -35.481088279 | 5.529234860  | 17.030100219 |
| C | -33.889332314 | 5.802732051  | 15.595946395 |
| H | -32.901913631 | 5.372650046  | 15.368527303 |
| H | -33.702985785 | 6.845973480  | 15.869582085 |
| C | -34.621050439 | 5.808742608  | 14.272328582 |



|   |               |              |              |
|---|---------------|--------------|--------------|
| O | -34.432823042 | 6.669553461  | 13.412064887 |
| O | -35.442501455 | 4.767463228  | 14.116443729 |
| C | -37.942000000 | 5.930000000  | 10.930000000 |
| H | -38.249120974 | 6.444557547  | 10.012901587 |
| H | -38.837111006 | 5.537544939  | 11.423435025 |
| H | -37.472966767 | 6.667111090  | 11.592492953 |
| C | -36.977505749 | 4.793542318  | 10.602047945 |
| H | -37.503239615 | 4.052605354  | 9.987757039  |
| C | -35.726056541 | 5.255334210  | 9.855390380  |
| H | -35.064673496 | 4.407127874  | 9.647797894  |
| H | -36.001320049 | 5.709616240  | 8.895295177  |
| H | -35.170513026 | 5.998349007  | 10.437906441 |
| O | -36.629969203 | 4.139407243  | 11.857189878 |
| C | -43.719576163 | 0.874951229  | 6.195371253  |
| H | -43.018174792 | 0.333106303  | 5.536443520  |
| O | -44.953494143 | 0.803247420  | 6.031654492  |
| N | -43.088757584 | 1.584336418  | 7.141727583  |
| H | -42.073548402 | 1.518245166  | 7.151086818  |
| C | -43.747000000 | 2.383000000  | 8.174000000  |
| H | -44.534930335 | 2.975976024  | 7.698005289  |
| H | -44.231033166 | 1.722164237  | 8.904207856  |
| C | -42.766782056 | 3.313641468  | 8.892801542  |
| H | -42.242765510 | 3.920914223  | 8.141334376  |
| C | -43.501125801 | 4.244843767  | 9.850167366  |
| H | -42.785843878 | 4.906032201  | 10.348051812 |
| H | -44.226063830 | 4.861543312  | 9.308302454  |
| H | -44.037334478 | 3.676258023  | 10.618742598 |
| O | -41.800188248 | 2.549825032  | 9.644229980  |
| H | -41.013846702 | 2.407147089  | 9.086214185  |
| C | -43.148000000 | -0.495000000 | 19.676000000 |
| H | -42.125068717 | -0.584445101 | 19.313157750 |
| H | -43.107551835 | -0.476579009 | 20.775015785 |
| C | -43.958916296 | -1.727022205 | 19.274632890 |
| H | -43.571162518 | -2.595574487 | 19.827145333 |
| H | -45.006317519 | -1.597558979 | 19.562534107 |
| O | -43.959405292 | -1.988290517 | 17.868608313 |
| H | -43.035857708 | -2.128355973 | 17.588582806 |
| C | -43.745833721 | 0.842098410  | 19.244848098 |
| O | -44.946184069 | 1.130160537  | 19.448891738 |
| N | -42.860022489 | 1.685847592  | 18.679215623 |
| H | -41.899167197 | 1.340772103  | 18.528355387 |
| C | -43.209000000 | 2.973000000  | 18.111000000 |
| H | -43.762897276 | 3.579032661  | 18.831398966 |
| H | -42.279823805 | 3.500769563  | 17.877240781 |
| C | -44.069116660 | 2.914753242  | 16.842143065 |
| O | -45.038379987 | 3.697248716  | 16.702195247 |

|   |               |              |              |
|---|---------------|--------------|--------------|
| N | -43.698443066 | 2.013674748  | 15.927918704 |
| H | -42.822657059 | 1.486841330  | 16.064242653 |
| C | -44.412000000 | 1.890000000  | 14.669000000 |
| H | -44.493788990 | 2.884060284  | 14.212277869 |
| H | -45.440747066 | 1.557188634  | 14.856418284 |
| C | -43.741797022 | 0.956366022  | 13.659657964 |
| H | -44.193772460 | 1.160063664  | 12.685973529 |
| H | -42.674640162 | 1.179929654  | 13.580451544 |
| C | -43.973956854 | -0.529205935 | 13.920104805 |
| O | -45.069673190 | -1.066740548 | 13.636586397 |
| N | -42.936685419 | -1.210069206 | 14.424446300 |
| H | -43.068304761 | -2.178451334 | 14.678962885 |
| H | -42.142544635 | -0.720758250 | 14.834088609 |
| C | -41.764000000 | -6.382000000 | 14.826000000 |
| H | -41.147153170 | -7.090209016 | 14.256638697 |
| H | -42.797607751 | -6.747453072 | 14.817466022 |
| H | -41.728465549 | -5.414684870 | 14.311979012 |
| C | -41.238810168 | -6.265180460 | 16.251005948 |
| H | -41.246536698 | -7.250938848 | 16.732836054 |
| H | -40.199893421 | -5.912483500 | 16.242368921 |
| O | -42.036902813 | -5.395001520 | 17.069777024 |
| H | -41.662211181 | -4.481177441 | 17.016521633 |
| O | -38.810131866 | 3.927269146  | 15.138945267 |
| H | -37.968668470 | 3.905928060  | 14.660599864 |
| H | -38.854791685 | 3.033994151  | 15.575680020 |
| O | -42.557333804 | -0.281398203 | 10.548321200 |
| H | -42.350250787 | 0.632296635  | 10.279038806 |
| H | -41.670752347 | -0.653089442 | 10.686370531 |
| O | -43.574331065 | -6.355914702 | 19.191071176 |
| H | -43.035664177 | -5.978065070 | 18.456060080 |
| H | -44.472288145 | -6.042161801 | 19.001447395 |
| H | -36.455377770 | 3.191020331  | 11.705884649 |
| H | -35.813878986 | 4.726243117  | 13.183208453 |

**Text S2.** Coordinate file (xyz format) for the lowest-energy RO-P<sup>HE</sup>H state as computed from a DFT/SCRF single point energy calculation following geometry optimization of the active site quantum cluster at the OLYP/TZP level of theory. This low-energy state corresponds to a BS state where Fe1, Fe2, Fe3 and Fe4 (as numbered in Fig. 2B) have net spins of  $\beta$ ,  $\alpha$ ,  $\alpha$  and  $\beta$ , respectively.

204

0.0000

|    |               |              |              |
|----|---------------|--------------|--------------|
| Fe | -36.839941231 | -0.080007814 | 10.802147033 |
| Fe | -38.006022049 | -2.330152903 | 9.561121462  |
| Fe | -37.965767553 | 0.129626958  | 8.304961166  |
| Fe | -35.613430820 | -1.256732687 | 8.668214198  |
| S  | -39.048613261 | -0.364985482 | 10.308135392 |
| S  | -36.097615303 | -2.307498637 | 10.681354263 |
| S  | -35.996089309 | 1.024316933  | 8.882339254  |
| S  | -37.322698834 | -1.928558929 | 7.316905134  |
| S  | -39.159357636 | -4.292927131 | 9.910410126  |
| C  | -40.420933445 | -4.489246743 | 8.584699666  |
| H  | -40.087000000 | -5.237000000 | 7.860000000  |
| H  | -41.359678685 | -4.825090247 | 9.034025890  |
| H  | -40.598821405 | -3.545713670 | 8.064711438  |
| S  | -33.346711378 | -1.639587415 | 8.404752888  |
| C  | -32.786484121 | -1.202039545 | 10.106249665 |
| H  | -31.801000000 | -1.623000000 | 10.285000000 |
| H  | -32.753464789 | -0.117572270 | 10.236079930 |
| H  | -33.472506949 | -1.624359104 | 10.839642071 |
| S  | -39.420925656 | 1.511750581  | 7.168974397  |
| C  | -38.293772886 | 2.768398783  | 6.438899881  |
| H  | -38.869000000 | 3.673000000  | 6.263000000  |
| H  | -37.481967161 | 2.996921760  | 7.130423643  |
| H  | -37.875698502 | 2.411212930  | 5.494329912  |
| O  | -36.077265409 | 1.008529947  | 12.158003006 |
| C  | -36.394037764 | 0.774246479  | 13.521053362 |
| H  | -37.279336657 | 1.354126053  | 13.809440231 |
| H  | -35.555373489 | 1.144188856  | 14.137139702 |
| C  | -36.648577846 | -0.692809324 | 13.842463098 |
| C  | -37.925319557 | -1.112489317 | 13.860943778 |
| H  | -38.702798158 | -0.374296061 | 13.667524198 |
| C  | -35.438188240 | -1.566274090 | 14.073678740 |
| H  | -34.599008826 | -1.232181529 | 13.456141991 |

|   |               |              |              |
|---|---------------|--------------|--------------|
| H | -35.112347853 | -1.497700647 | 15.118135662 |
| H | -35.614622443 | -2.620389003 | 13.848716377 |
| C | -38.455499943 | -2.497878232 | 14.046240933 |
| H | -37.727951636 | -3.193494418 | 14.466526616 |
| H | -38.810166610 | -2.901211619 | 13.092337655 |
| O | -39.662190973 | -2.510005920 | 14.884708301 |
| P | -39.553828480 | -2.438880582 | 16.494280786 |
| O | -38.433793051 | -3.324049561 | 17.017197904 |
| O | -40.956197791 | -2.615435890 | 17.013853441 |
| O | -38.976643226 | -0.924151758 | 16.815038599 |
| P | -39.419271509 | 0.628164948  | 16.978440587 |
| O | -38.235802391 | 1.483883559  | 16.639358179 |
| O | -40.608940488 | 0.836327641  | 15.874677502 |
| O | -40.049405568 | 0.773285164  | 18.366228944 |
| C | -35.064000000 | -5.724000000 | 10.267000000 |
| O | -33.959469735 | -6.159462614 | 10.648375389 |
| H | -35.140732304 | -4.815492354 | 9.653994336  |
| N | -36.245556702 | -6.297301551 | 10.526058427 |
| H | -37.111076784 | -5.847919636 | 10.234241586 |
| H | -36.295839669 | -7.125038355 | 11.107081751 |
| C | -37.840185032 | -5.689637667 | 19.854872481 |
| H | -37.112931824 | -5.891664901 | 19.048066872 |
| O | -37.822886464 | -6.345086545 | 20.914800681 |
| N | -38.682319735 | -4.693475938 | 19.541163213 |
| H | -38.616021686 | -4.298850121 | 18.597058427 |
| C | -39.795000000 | -4.261000000 | 20.371000000 |
| H | -39.608586788 | -4.603458979 | 21.390675815 |
| H | -40.711411676 | -4.766174490 | 20.040787943 |
| C | -40.074370501 | -2.760857426 | 20.342623828 |
| H | -40.299142248 | -2.448937740 | 19.321378554 |
| H | -40.994220882 | -2.611921329 | 20.921696602 |
| C | -39.010918522 | -1.882548338 | 20.919061840 |
| N | -38.823390087 | -0.577680379 | 20.491954100 |
| H | -39.314061374 | -0.108383638 | 19.701222227 |
| C | -37.868593875 | 0.004347024  | 21.220776777 |
| H | -37.524128852 | 1.021781011  | 21.127549740 |
| N | -37.430527070 | -0.893701158 | 22.102144980 |
| H | -36.712313065 | -0.724035799 | 22.794753395 |
| C | -38.118115127 | -2.073070981 | 21.942746834 |
| H | -37.917950122 | -2.929354028 | 22.567670445 |
| C | -32.924000000 | 0.447000000  | 16.553000000 |
| H | -32.190993441 | 1.253498584  | 16.435884386 |
| H | -32.403154885 | -0.503630204 | 16.399260107 |
| H | -33.678652618 | 0.557522267  | 15.771794790 |
| C | -33.557669381 | 0.515232954  | 17.953040223 |
| H | -32.780379162 | 0.490310515  | 18.724653824 |

|   |               |              |              |
|---|---------------|--------------|--------------|
| H | -34.091923418 | 1.462553031  | 18.074013092 |
| C | -34.517186296 | -0.607257237 | 18.168398934 |
| N | -34.162968675 | -1.821910971 | 18.726240841 |
| H | -33.272328669 | -2.044367367 | 19.154705215 |
| C | -35.172080369 | -2.691798914 | 18.616916499 |
| H | -35.157411123 | -3.712093305 | 18.964080274 |
| N | -36.177167680 | -2.066278646 | 18.007266057 |
| H | -37.062800426 | -2.517479226 | 17.687869188 |
| C | -35.802713806 | -0.771839207 | 17.725514216 |
| H | -36.460028498 | -0.085823802 | 17.212104570 |
| C | -30.321000000 | 1.083000000  | 7.036000000  |
| H | -29.983633426 | 0.108014973  | 7.430338012  |
| O | -29.510492235 | 1.908878018  | 6.574820351  |
| N | -31.645627757 | 1.254113643  | 7.115855813  |
| H | -32.240221025 | 0.495486186  | 7.447755059  |
| H | -32.072942018 | 2.098477017  | 6.755646256  |
| C | -36.911000000 | 6.089000000  | 22.221000000 |
| H | -36.726798259 | 6.994650552  | 22.812517328 |
| H | -37.346958243 | 5.336333344  | 22.888579926 |
| H | -35.944233214 | 5.713641046  | 21.875028325 |
| C | -37.845283947 | 6.387238971  | 21.045495601 |
| H | -38.800189502 | 6.780467381  | 21.411074131 |
| H | -37.401599491 | 7.169406501  | 20.414761435 |
| C | -38.092114302 | 5.157980293  | 20.232274458 |
| N | -37.059136745 | 4.519177577  | 19.568958528 |
| C | -37.592189189 | 3.434424861  | 19.032686706 |
| H | -37.086657301 | 2.714918523  | 18.407688185 |
| N | -38.911122593 | 3.335153970  | 19.317663698 |
| H | -39.503821583 | 2.566664130  | 19.007114810 |
| C | -39.251648609 | 4.428132531  | 20.083657061 |
| H | -40.256857033 | 4.583990017  | 20.451094015 |
| C | -33.593000000 | 4.997000000  | 17.938000000 |
| H | -32.719548897 | 4.393929188  | 17.667866231 |
| H | -33.211336922 | 6.004995344  | 18.155411836 |
| N | -34.172506093 | 4.437945985  | 19.154943363 |
| H | -35.187895902 | 4.550947986  | 19.321768958 |
| C | -33.447097200 | 3.945953357  | 20.166333031 |
| H | -34.073044100 | 3.621114260  | 21.016153468 |
| O | -32.204570084 | 3.828416272  | 20.207101919 |
| C | -34.570127419 | 5.059954481  | 16.770567896 |
| H | -34.860490390 | 4.048952610  | 16.468057192 |
| H | -35.486390634 | 5.579943640  | 17.071141879 |
| C | -33.921646941 | 5.801357136  | 15.599329997 |
| H | -32.951807816 | 5.342136671  | 15.354132247 |
| H | -33.701762760 | 6.840406678  | 15.863067507 |
| C | -34.675262066 | 5.821990550  | 14.288207198 |

|   |               |              |              |
|---|---------------|--------------|--------------|
| O | -34.491744196 | 6.685770527  | 13.430315179 |
| O | -35.507787057 | 4.787830340  | 14.136829872 |
| C | -37.942000000 | 5.930000000  | 10.930000000 |
| H | -38.226696254 | 6.458538189  | 10.013648107 |
| H | -38.852134591 | 5.539480221  | 11.397875352 |
| H | -37.483490628 | 6.656157816  | 11.611592049 |
| C | -36.979769016 | 4.793194774  | 10.607575734 |
| H | -37.495288303 | 4.063699584  | 9.971691123  |
| C | -35.709799451 | 5.258576638  | 9.896184237  |
| H | -35.046485108 | 4.411552888  | 9.690280349  |
| H | -35.965184022 | 5.725255326  | 8.936601016  |
| H | -35.164405110 | 5.992340497  | 10.499649598 |
| O | -36.673265008 | 4.120806420  | 11.864563618 |
| C | -43.626032000 | 0.722629363  | 6.325508669  |
| H | -42.894409360 | 0.214735019  | 5.672958962  |
| O | -44.846160893 | 0.485989651  | 6.238827918  |
| N | -43.044930558 | 1.581351356  | 7.173681005  |
| H | -42.028716809 | 1.624377028  | 7.136651251  |
| C | -43.747000000 | 2.383000000  | 8.174000000  |
| H | -44.537244652 | 2.953057289  | 7.672369171  |
| H | -44.234909165 | 1.722893238  | 8.901633383  |
| C | -42.805145316 | 3.349288350  | 8.898495890  |
| H | -42.280485475 | 3.956354117  | 8.147207966  |
| C | -43.582076744 | 4.278903277  | 9.822672269  |
| H | -42.892484098 | 4.962060502  | 10.327056576 |
| H | -44.305576919 | 4.872446500  | 9.254217438  |
| H | -44.125954835 | 3.711299510  | 10.586711597 |
| O | -41.831398569 | 2.632166966  | 9.687841187  |
| H | -41.044331696 | 2.469709934  | 9.134037201  |
| C | -43.148000000 | -0.495000000 | 19.676000000 |
| H | -42.111275272 | -0.582229750 | 19.352871031 |
| H | -43.158849741 | -0.520372389 | 20.774047956 |
| C | -43.953219566 | -1.694843911 | 19.172153691 |
| H | -43.576343648 | -2.604526986 | 19.659259977 |
| H | -45.004595445 | -1.583092943 | 19.450595778 |
| O | -43.925854487 | -1.832618040 | 17.747009185 |
| H | -43.011580760 | -2.045774893 | 17.489080387 |
| C | -43.731313758 | 0.847353767  | 19.268349476 |
| O | -44.894050004 | 1.182426730  | 19.557564894 |
| N | -42.880494086 | 1.642521342  | 18.569104096 |
| H | -41.927385209 | 1.309076830  | 18.428439402 |
| C | -43.209000000 | 2.973000000  | 18.111000000 |
| H | -43.907289404 | 3.443334273  | 18.807000231 |
| H | -42.302873511 | 3.586291142  | 18.106955782 |
| C | -43.828720370 | 3.094589246  | 16.723100522 |
| O | -44.245499779 | 4.203089856  | 16.335922674 |

|   |               |              |              |
|---|---------------|--------------|--------------|
| N | -43.850990278 | 1.968182762  | 15.997358324 |
| H | -43.536778316 | 1.122522118  | 16.455609302 |
| C | -44.412000000 | 1.890000000  | 14.669000000 |
| H | -44.363932827 | 2.893247492  | 14.240289152 |
| H | -45.474947784 | 1.620942144  | 14.719124770 |
| C | -43.696947487 | 0.916853001  | 13.729193457 |
| H | -44.058254373 | 1.129260144  | 12.719035139 |
| H | -42.619053763 | 1.095520434  | 13.725059487 |
| C | -44.030387664 | -0.551534168 | 13.974602654 |
| O | -45.199981513 | -0.967985863 | 13.873920284 |
| N | -43.001436261 | -1.366437889 | 14.275734800 |
| H | -43.182892665 | -2.344442596 | 14.452846603 |
| H | -42.060430826 | -1.030607286 | 14.415083544 |
| C | -41.764000000 | -6.382000000 | 14.826000000 |
| H | -41.121359768 | -7.113468791 | 14.318827803 |
| H | -42.787900521 | -6.774063623 | 14.830068399 |
| H | -41.747443987 | -5.454506825 | 14.241218100 |
| C | -41.264255678 | -6.151157256 | 16.243869883 |
| H | -41.259072129 | -7.098276601 | 16.797002841 |
| H | -40.234313583 | -5.776606690 | 16.227035789 |
| O | -42.100359922 | -5.237962324 | 16.981986270 |
| H | -41.691117954 | -4.346961716 | 16.946749118 |
| O | -38.984711177 | 3.739704649  | 15.051561904 |
| H | -38.266600527 | 3.979825612  | 14.445084124 |
| H | -38.583185811 | 3.063669573  | 15.636635993 |
| O | -42.510416552 | -0.223981778 | 10.626800380 |
| H | -42.349902324 | 0.691137123  | 10.331196617 |
| H | -41.611334514 | -0.592613660 | 10.625300666 |
| O | -43.707232830 | -6.190103907 | 19.092194741 |
| H | -43.157723257 | -5.813595153 | 18.367939373 |
| H | -44.613982591 | -5.960765184 | 18.834667751 |
| H | -36.424462871 | 3.190846404  | 11.696700119 |
| H | -40.309258669 | 1.523611938  | 15.255100166 |
| H | -35.873754700 | 4.743337212  | 13.202856035 |

**Text S3.** Coordinate file (xyz format) for the lowest-energy RO<sup>H</sup>P-E<sup>-</sup> state as computed from a DFT/SCRF single point energy calculation following geometry optimization of the active site quantum cluster at the OLYP/TZP level of theory. This low-energy state corresponds to a BS state where Fe1, Fe2, Fe3 and Fe4 (as numbered in Fig. 2B) have net spins of  $\beta$ ,  $\alpha$ ,  $\alpha$  and  $\beta$ , respectively.

203

0.0000

|    |               |              |              |
|----|---------------|--------------|--------------|
| Fe | -36.963073988 | -0.058123418 | 10.596341215 |
| Fe | -38.008872932 | -2.264446202 | 9.463449651  |
| Fe | -37.888552871 | 0.118432979  | 8.091362382  |
| Fe | -35.609979328 | -1.263559750 | 8.633165546  |
| S  | -39.093792519 | -0.288729209 | 10.023526640 |
| S  | -36.165134792 | -2.215287278 | 10.667910106 |
| S  | -35.967628366 | 1.023668526  | 8.791081723  |
| S  | -37.227639581 | -1.982836121 | 7.252325095  |
| S  | -39.221355403 | -4.139771388 | 9.827374448  |
| C  | -40.337138289 | -4.309633918 | 8.376087865  |
| H  | -40.087000000 | -5.237000000 | 7.860000000  |
| H  | -41.376138202 | -4.344886503 | 8.714496879  |
| H  | -40.212239924 | -3.477238021 | 7.681858368  |
| S  | -33.365724308 | -1.697606420 | 8.430941419  |
| C  | -32.804242895 | -1.238864145 | 10.124051839 |
| H  | -31.801000000 | -1.623000000 | 10.285000000 |
| H  | -32.805792659 | -0.153366141 | 10.251728566 |
| H  | -33.463393559 | -1.687625839 | 10.866881935 |
| S  | -39.251271980 | 1.345299467  | 6.731699071  |
| C  | -38.222507609 | 2.798533103  | 6.263005325  |
| H  | -38.869000000 | 3.673000000  | 6.263000000  |
| H  | -37.423993042 | 2.954543843  | 6.987227504  |
| H  | -37.792203088 | 2.656294098  | 5.268366850  |
| O  | -36.280193235 | 1.176916268  | 12.161584606 |
| C  | -36.695999844 | 0.923961443  | 13.557531570 |
| H  | -37.631600568 | 1.451765970  | 13.739770302 |
| H  | -35.915004445 | 1.359901895  | 14.192629616 |
| C  | -36.852509079 | -0.548578689 | 13.824275001 |
| C  | -38.108008055 | -1.028966031 | 13.897996560 |
| H  | -38.938150024 | -0.338660703 | 13.756053254 |
| C  | -35.606925889 | -1.386097675 | 14.039048645 |
| H  | -34.700217027 | -0.780651673 | 13.961177439 |



|   |               |              |              |
|---|---------------|--------------|--------------|
| H | -35.608674825 | -1.856089778 | 15.028750872 |
| H | -35.518391922 | -2.190677652 | 13.304265906 |
| C | -38.525864872 | -2.443659712 | 14.155362693 |
| H | -37.731682780 | -3.047979682 | 14.600339108 |
| H | -38.824196041 | -2.919808930 | 13.213346486 |
| O | -39.717319907 | -2.518756705 | 14.982166865 |
| P | -39.602922879 | -2.387300161 | 16.603874075 |
| O | -38.443185228 | -3.266054182 | 17.097741994 |
| O | -40.990595917 | -2.701411521 | 17.121880687 |
| O | -39.117009395 | -0.900070721 | 16.935348238 |
| P | -39.816038418 | 0.669781174  | 16.929415671 |
| O | -40.142133220 | 0.858340607  | 18.461677544 |
| O | -41.057054045 | 0.623815921  | 16.061740262 |
| O | -38.645800553 | 1.536033713  | 16.504243487 |
| C | -35.064000000 | -5.724000000 | 10.267000000 |
| O | -33.997430427 | -6.283064226 | 10.588698903 |
| H | -35.066565608 | -4.779732607 | 9.703572909  |
| N | -36.287969701 | -6.189245540 | 10.543015642 |
| H | -37.116011427 | -5.676902598 | 10.252517529 |
| H | -36.402594042 | -7.054590767 | 11.056028721 |
| C | -37.860147420 | -5.693933479 | 19.826264906 |
| H | -37.118923497 | -5.878233615 | 19.027752944 |
| O | -37.865737273 | -6.386553264 | 20.865961500 |
| N | -38.687769829 | -4.684934354 | 19.530358410 |
| H | -38.606893971 | -4.249156683 | 18.599494901 |
| C | -39.795000000 | -4.261000000 | 20.371000000 |
| H | -39.588008909 | -4.593145998 | 21.390958413 |
| H | -40.709014696 | -4.783404935 | 20.059456004 |
| C | -40.101256547 | -2.763820565 | 20.334231044 |
| H | -40.374238464 | -2.475183524 | 19.319067941 |
| H | -41.000611463 | -2.627225573 | 20.947627818 |
| C | -39.035875865 | -1.850886569 | 20.852177436 |
| N | -38.881625152 | -0.548226260 | 20.396754129 |
| H | -39.406067089 | -0.057222013 | 19.598529588 |
| C | -37.905096938 | 0.043883437  | 21.084668625 |
| H | -37.561847162 | 1.058073815  | 20.957412935 |
| N | -37.422768310 | -0.835760042 | 21.965016048 |
| H | -36.678693581 | -0.649838785 | 22.624693324 |
| C | -38.105762989 | -2.022605309 | 21.846604940 |
| H | -37.875941829 | -2.869021454 | 22.475380036 |
| C | -32.924000000 | 0.447000000  | 16.553000000 |
| H | -32.171810025 | 1.236960919  | 16.443612255 |
| H | -32.418459681 | -0.516493239 | 16.430950507 |
| H | -33.652030085 | 0.558703946  | 15.746581793 |
| C | -33.603816442 | 0.553110724  | 17.928366086 |
| H | -32.850756610 | 0.530310629  | 18.723970027 |

|   |               |              |              |
|---|---------------|--------------|--------------|
| H | -34.124040028 | 1.511464945  | 18.013928492 |
| C | -34.584673183 | -0.552459019 | 18.136851406 |
| N | -34.228457208 | -1.779361056 | 18.665239357 |
| H | -33.332583789 | -2.012540095 | 19.076448654 |
| C | -35.252056627 | -2.634955702 | 18.566803009 |
| H | -35.237872199 | -3.659727480 | 18.900333999 |
| N | -36.266576413 | -1.991976027 | 17.994982453 |
| H | -37.174478861 | -2.447633067 | 17.681826465 |
| C | -35.885017947 | -0.697012756 | 17.725077168 |
| H | -36.559976124 | -0.001796445 | 17.245015124 |
| C | -30.321000000 | 1.083000000  | 7.036000000  |
| H | -29.964202015 | 0.086021826  | 7.349861073  |
| O | -29.531717890 | 1.949429902  | 6.615663271  |
| N | -31.644869726 | 1.234769491  | 7.161686580  |
| H | -32.224614027 | 0.452503495  | 7.457883971  |
| H | -32.089540890 | 2.096380499  | 6.870059486  |
| C | -36.911000000 | 6.089000000  | 22.221000000 |
| H | -36.740025360 | 7.014277613  | 22.785783112 |
| H | -37.345539739 | 5.352170000  | 22.907496095 |
| H | -35.937988616 | 5.710917626  | 21.895630823 |
| C | -37.838444689 | 6.340239492  | 21.026968026 |
| H | -38.799761733 | 6.733593160  | 21.376610200 |
| H | -37.396821328 | 7.115737737  | 20.386063772 |
| C | -38.071139651 | 5.097646780  | 20.223587028 |
| N | -37.037662626 | 4.473312745  | 19.548524459 |
| C | -37.572575056 | 3.393990012  | 18.995614419 |
| H | -37.069095107 | 2.687249418  | 18.353111448 |
| N | -38.886574712 | 3.278775831  | 19.282146167 |
| H | -39.470332132 | 2.489547594  | 18.959009796 |
| C | -39.226829879 | 4.359068285  | 20.065507737 |
| H | -40.232267130 | 4.510342664  | 20.435604029 |
| C | -33.593000000 | 4.997000000  | 17.938000000 |
| H | -32.736811465 | 4.360746128  | 17.684525530 |
| H | -33.187029555 | 6.008126027  | 18.085069451 |
| N | -34.154023685 | 4.520525932  | 19.199844083 |
| H | -35.179981186 | 4.576397020  | 19.343948512 |
| C | -33.418286229 | 4.110778161  | 20.236297722 |
| H | -34.034614186 | 3.811645533  | 21.102356994 |
| O | -32.169880686 | 4.042192654  | 20.288990705 |
| C | -34.601826741 | 5.015092376  | 16.792493180 |
| H | -35.008756559 | 4.012620093  | 16.623078409 |
| H | -35.450837171 | 5.653530936  | 17.062083254 |
| C | -33.948677401 | 5.538332986  | 15.512663621 |
| H | -33.171000064 | 4.834004098  | 15.180159296 |
| H | -33.431770501 | 6.484176501  | 15.710782577 |
| C | -34.879257850 | 5.755974582  | 14.300891551 |

|   |               |              |              |
|---|---------------|--------------|--------------|
| O | -34.532374234 | 6.677633497  | 13.494284233 |
| O | -35.889891674 | 4.998074448  | 14.174548911 |
| C | -37.942000000 | 5.930000000  | 10.930000000 |
| H | -38.114475669 | 6.517708228  | 10.020034518 |
| H | -38.900550882 | 5.513702638  | 11.259912254 |
| H | -37.570416514 | 6.604964315  | 11.709668043 |
| C | -36.940713015 | 4.796379871  | 10.655500805 |
| H | -37.359454758 | 4.155377396  | 9.870475553  |
| C | -35.576895948 | 5.310645806  | 10.187817407 |
| H | -34.913557904 | 4.469259111  | 9.957407052  |
| H | -35.679926636 | 5.922488415  | 9.282370064  |
| H | -35.108531362 | 5.918509568  | 10.969743071 |
| O | -36.805902828 | 3.918356833  | 11.793707487 |
| C | -43.567556466 | 0.634526985  | 6.423748181  |
| H | -42.823814849 | 0.098987075  | 5.808130034  |
| O | -44.786175815 | 0.388422627  | 6.337107915  |
| N | -43.006810444 | 1.540917543  | 7.236527341  |
| H | -41.994055527 | 1.612875230  | 7.193598122  |
| C | -43.747000000 | 2.383000000  | 8.174000000  |
| H | -44.480866128 | 2.973210016  | 7.612937389  |
| H | -44.308119311 | 1.748006247  | 8.870126191  |
| C | -42.838888520 | 3.330440340  | 8.959790270  |
| H | -42.231410747 | 3.910574163  | 8.251161055  |
| C | -43.662322190 | 4.295322838  | 9.803999594  |
| H | -43.000004854 | 4.976754335  | 10.345654465 |
| H | -44.329321931 | 4.888882099  | 9.170266134  |
| H | -44.273231725 | 3.752758696  | 10.534592507 |
| O | -41.960248467 | 2.586907465  | 9.840292737  |
| H | -41.108249227 | 2.471774892  | 9.392778650  |
| C | -43.148000000 | -0.495000000 | 19.676000000 |
| H | -42.116753014 | -0.583039060 | 19.335995065 |
| H | -43.134404308 | -0.484842985 | 20.775608682 |
| C | -43.951323222 | -1.720531313 | 19.241897899 |
| H | -43.565809824 | -2.598453566 | 19.782723580 |
| H | -45.002466271 | -1.601005330 | 19.520332473 |
| O | -43.933454061 | -1.950573221 | 17.831931443 |
| H | -43.003513489 | -2.061396108 | 17.561417933 |
| C | -43.734338967 | 0.844910629  | 19.241998699 |
| O | -44.926038369 | 1.151698581  | 19.467119395 |
| N | -42.855251442 | 1.673113871  | 18.641616379 |
| H | -41.890601282 | 1.337750149  | 18.506892615 |
| C | -43.209000000 | 2.973000000  | 18.111000000 |
| H | -43.794442018 | 3.538633906  | 18.839855440 |
| H | -42.285141667 | 3.531325181  | 17.929933035 |
| C | -44.025057123 | 2.973214679  | 16.816837597 |
| O | -44.872646920 | 3.873001941  | 16.612024636 |

|   |               |              |              |
|---|---------------|--------------|--------------|
| N | -43.750429375 | 1.987646363  | 15.956745437 |
| H | -42.932530792 | 1.401542822  | 16.141168756 |
| C | -44.412000000 | 1.890000000  | 14.669000000 |
| H | -44.485996051 | 2.894942958  | 14.239101781 |
| H | -45.441213468 | 1.533145659  | 14.800698253 |
| C | -43.670369116 | 0.990777691  | 13.678984920 |
| H | -44.077143621 | 1.194975150  | 12.685384545 |
| H | -42.607638274 | 1.248176840  | 13.661954535 |
| C | -43.872133331 | -0.503556162 | 13.912102439 |
| O | -44.960894010 | -1.056544666 | 13.635706675 |
| N | -42.811888196 | -1.175101970 | 14.383553394 |
| H | -42.918124562 | -2.154359066 | 14.607463439 |
| H | -42.019494952 | -0.685294756 | 14.796815360 |
| C | -41.764000000 | -6.382000000 | 14.826000000 |
| H | -41.055827961 | -7.102281930 | 14.394911382 |
| H | -42.757840388 | -6.845357175 | 14.828775637 |
| H | -41.792209743 | -5.500643728 | 14.174648401 |
| C | -41.337610410 | -6.003425951 | 16.232689451 |
| H | -41.270554158 | -6.904940937 | 16.858833482 |
| H | -40.342861876 | -5.545166643 | 16.214667275 |
| O | -42.276062526 | -5.093180360 | 16.834966894 |
| H | -41.808301570 | -4.228262528 | 16.947921814 |
| O | -38.658269654 | 3.954680421  | 15.204541057 |
| H | -37.729679068 | 4.108340299  | 14.967750870 |
| H | -38.666770935 | 3.076728503  | 15.662472036 |
| O | -42.643325028 | -0.444640204 | 10.452986032 |
| H | -42.474381836 | 0.498387297  | 10.283186311 |
| H | -41.745956876 | -0.805194493 | 10.515684946 |
| O | -44.036688816 | -6.324011692 | 18.633773350 |
| H | -43.410624133 | -5.830108268 | 18.052291644 |
| H | -44.682577525 | -5.652470604 | 18.903321170 |
| H | -36.461095433 | 4.437009423  | 12.565679880 |
| H | -36.422298478 | 2.145232902  | 11.982036849 |

**Text S4.** Coordinate file (xyz format) for the lowest-energy RO<sup>H</sup>P<sup>H</sup>E<sup>-</sup> state as computed from a DFT/SCRF single point energy calculation following geometry optimization of the active site quantum cluster at the OLYP/TZP level of theory. This low-energy state corresponds to a BS state where Fe1, Fe2, Fe3 and Fe4 (as numbered in Fig. 2B) have net spins of  $\beta$ ,  $\alpha$ ,  $\alpha$  and  $\beta$ , respectively.

204

0.0000

|    |               |              |              |
|----|---------------|--------------|--------------|
| Fe | -36.934190017 | -0.076342543 | 10.636255829 |
| Fe | -38.005746838 | -2.249165195 | 9.503662312  |
| Fe | -37.895597428 | 0.139531651  | 8.169773073  |
| Fe | -35.614432230 | -1.260424340 | 8.655513801  |
| S  | -39.077769059 | -0.280897901 | 10.117130223 |
| S  | -36.151028803 | -2.236367269 | 10.689534812 |
| S  | -35.959075866 | 1.029622721  | 8.849166338  |
| S  | -37.254668266 | -1.942893969 | 7.288498247  |
| S  | -39.228356653 | -4.122320526 | 9.808581389  |
| C  | -40.284093464 | -4.265377620 | 8.311133705  |
| H  | -40.087000000 | -5.237000000 | 7.860000000  |
| H  | -41.338133798 | -4.193545930 | 8.590470918  |
| H  | -40.045747019 | -3.487835843 | 7.584638121  |
| S  | -33.378534938 | -1.707863893 | 8.441200198  |
| C  | -32.825350646 | -1.290490183 | 10.147611573 |
| H  | -31.801000000 | -1.623000000 | 10.285000000 |
| H  | -32.885785587 | -0.213406809 | 10.320668128 |
| H  | -33.451182135 | -1.806556983 | 10.875450026 |
| S  | -39.289210490 | 1.399418421  | 6.888500678  |
| C  | -38.224743234 | 2.806097569  | 6.373757992  |
| H  | -38.869000000 | 3.673000000  | 6.263000000  |
| H  | -37.475305700 | 3.021188983  | 7.134644614  |
| H  | -37.731824834 | 2.588228907  | 5.423605452  |
| O  | -36.155985974 | 1.106345549  | 12.232253869 |
| C  | -36.604164575 | 0.848734691  | 13.611239996 |
| H  | -37.521489106 | 1.412067555  | 13.778303222 |
| H  | -35.827806026 | 1.244567844  | 14.276417207 |
| C  | -36.826598295 | -0.624012931 | 13.854579874 |
| C  | -38.099801401 | -1.060428107 | 13.842626454 |
| H  | -38.890238628 | -0.341801704 | 13.629753744 |
| C  | -35.633645060 | -1.515724191 | 14.129980610 |
| H  | -34.701876273 | -0.947581970 | 14.156973036 |

|   |               |              |              |
|---|---------------|--------------|--------------|
| H | -35.736907175 | -2.033740915 | 15.088822540 |
| H | -35.517296993 | -2.288791292 | 13.365905242 |
| C | -38.591667347 | -2.453177828 | 14.079146009 |
| H | -37.828337390 | -3.115222069 | 14.490885532 |
| H | -38.958519927 | -2.890227284 | 13.144018257 |
| O | -39.766564087 | -2.463702281 | 14.950984887 |
| P | -39.604419221 | -2.397777927 | 16.564601771 |
| O | -38.480742936 | -3.294804711 | 17.047498628 |
| O | -40.994852650 | -2.549207216 | 17.118716784 |
| O | -38.993809179 | -0.895808906 | 16.860072283 |
| P | -39.398581721 | 0.669306617  | 17.030360831 |
| O | -40.016559882 | 0.823499480  | 18.419234081 |
| O | -40.600481351 | 0.894704530  | 15.930992529 |
| O | -38.203920750 | 1.488180825  | 16.656045085 |
| C | -35.064000000 | -5.724000000 | 10.267000000 |
| O | -34.002175697 | -6.271808613 | 10.620694885 |
| H | -35.060026703 | -4.812984805 | 9.650460099  |
| N | -36.292324571 | -6.162201131 | 10.566709599 |
| H | -37.114052914 | -5.654387896 | 10.252029058 |
| H | -36.417284357 | -6.994018100 | 11.129930043 |
| C | -37.842317024 | -5.682015943 | 19.823751479 |
| H | -37.123768899 | -5.871988576 | 19.006031956 |
| O | -37.811592818 | -6.348997192 | 20.875780568 |
| N | -38.688906147 | -4.683240343 | 19.529070116 |
| H | -38.631925500 | -4.281540702 | 18.586987177 |
| C | -39.795000000 | -4.261000000 | 20.371000000 |
| H | -39.613598030 | -4.640354356 | 21.378897933 |
| H | -40.719386928 | -4.741340547 | 20.024869071 |
| C | -40.055968906 | -2.757194881 | 20.402892793 |
| H | -40.315598832 | -2.407834794 | 19.402561813 |
| H | -40.951346683 | -2.618351064 | 21.022304986 |
| C | -38.963024555 | -1.907694049 | 20.965314030 |
| N | -38.794867366 | -0.585472271 | 20.583739172 |
| H | -39.301532596 | -0.095925548 | 19.822527671 |
| C | -37.802600856 | -0.033487227 | 21.285901180 |
| H | -37.458217133 | 0.985602772  | 21.214530589 |
| N | -37.323422878 | -0.967033769 | 22.106235055 |
| H | -36.571409813 | -0.822145127 | 22.767652931 |
| C | -38.019430474 | -2.140227795 | 21.933050428 |
| H | -37.786605428 | -3.022429860 | 22.508796411 |
| C | -32.924000000 | 0.447000000  | 16.553000000 |
| H | -32.169029717 | 1.228652762  | 16.411871712 |
| H | -32.431775604 | -0.522435352 | 16.426739312 |
| H | -33.675897773 | 0.558517300  | 15.769139346 |
| C | -33.557578150 | 0.574262633  | 17.949031217 |
| H | -32.781533473 | 0.567253981  | 18.722062475 |

|   |               |              |              |
|---|---------------|--------------|--------------|
| H | -34.081568891 | 1.530821715  | 18.036492168 |
| C | -34.528374878 | -0.531452537 | 18.197599863 |
| N | -34.178498330 | -1.742872685 | 18.765010150 |
| H | -33.283303844 | -1.969495471 | 19.182344029 |
| C | -35.196675133 | -2.603441995 | 18.681474297 |
| H | -35.188003826 | -3.619333973 | 19.041539782 |
| N | -36.205104650 | -1.974844626 | 18.078850744 |
| H | -37.086782116 | -2.428077918 | 17.769609683 |
| C | -35.821640522 | -0.686804452 | 17.774925750 |
| H | -36.479890372 | 0.000280347  | 17.264051088 |
| C | -30.321000000 | 1.083000000  | 7.036000000  |
| H | -29.942689416 | 0.091666030  | 7.341646346  |
| O | -29.555517380 | 1.962626164  | 6.599402019  |
| N | -31.644661343 | 1.215934392  | 7.184969939  |
| H | -32.211437849 | 0.429631850  | 7.494436913  |
| H | -32.102644330 | 2.076722096  | 6.911403101  |
| C | -36.911000000 | 6.089000000  | 22.221000000 |
| H | -36.696774487 | 6.981120555  | 22.823322440 |
| H | -37.404565198 | 5.357330089  | 22.871500833 |
| H | -35.956300019 | 5.665454308  | 21.900557822 |
| C | -37.794727214 | 6.439387619  | 21.020660923 |
| H | -38.739784543 | 6.878589022  | 21.358327795 |
| H | -37.293815094 | 7.196777748  | 20.402906920 |
| C | -38.069865626 | 5.213230464  | 20.213032192 |
| N | -37.036878240 | 4.514482583  | 19.614994160 |
| C | -37.587583099 | 3.429617448  | 19.099985357 |
| H | -37.083832421 | 2.670952641  | 18.522650776 |
| N | -38.918657647 | 3.384760154  | 19.339277228 |
| H | -39.521946281 | 2.620253026  | 19.042912852 |
| C | -39.248430058 | 4.518337998  | 20.049219193 |
| H | -40.259023119 | 4.720019714  | 20.377447974 |
| C | -33.593000000 | 4.997000000  | 17.938000000 |
| H | -32.738327983 | 4.358754269  | 17.685310958 |
| H | -33.191338464 | 6.013455446  | 18.054460864 |
| N | -34.133607491 | 4.549900548  | 19.219866795 |
| H | -35.155366767 | 4.604017114  | 19.374178754 |
| C | -33.381163462 | 4.201066996  | 20.268172120 |
| H | -33.985197977 | 3.925267405  | 21.150441647 |
| O | -32.132521064 | 4.161658087  | 20.313734135 |
| C | -34.625481290 | 4.985646816  | 16.812127276 |
| H | -35.016052388 | 3.973417750  | 16.660150748 |
| H | -35.480095220 | 5.609765662  | 17.097020329 |
| C | -34.013218132 | 5.513528823  | 15.512751405 |
| H | -33.257745184 | 4.803403189  | 15.144147204 |
| H | -33.480233581 | 6.451380952  | 15.702047884 |
| C | -34.985693741 | 5.759744713  | 14.340691693 |

|   |               |              |              |
|---|---------------|--------------|--------------|
| O | -34.691020109 | 6.714825058  | 13.558642933 |
| O | -35.986743771 | 4.984027092  | 14.214251471 |
| C | -37.942000000 | 5.930000000  | 10.930000000 |
| H | -38.101672425 | 6.530538905  | 10.026483782 |
| H | -38.904406320 | 5.505649098  | 11.238340631 |
| H | -37.585087905 | 6.594394740  | 11.725336339 |
| C | -36.928065635 | 4.805440009  | 10.650763052 |
| H | -37.341284778 | 4.164584913  | 9.863055475  |
| C | -35.571616093 | 5.335862071  | 10.178765575 |
| H | -34.901711743 | 4.501461634  | 9.942584647  |
| H | -35.684369064 | 5.949841029  | 9.275964086  |
| H | -35.104435198 | 5.947267094  | 10.958811433 |
| O | -36.774418284 | 3.918091902  | 11.781315057 |
| C | -43.515215083 | 0.585866695  | 6.482552276  |
| H | -42.758694897 | 0.060499087  | 5.873556521  |
| O | -44.723259779 | 0.285048424  | 6.424893071  |
| N | -42.982786869 | 1.545428113  | 7.251842142  |
| H | -41.975155370 | 1.662339704  | 7.186503578  |
| C | -43.747000000 | 2.383000000  | 8.174000000  |
| H | -44.491570338 | 2.949664336  | 7.602371232  |
| H | -44.297324817 | 1.743734859  | 8.874428658  |
| C | -42.865771940 | 3.362872545  | 8.950015975  |
| H | -42.271268176 | 3.948683913  | 8.235319379  |
| C | -43.714514657 | 4.317108706  | 9.780479410  |
| H | -43.071490106 | 5.026184591  | 10.309609058 |
| H | -44.398283622 | 4.881782242  | 9.138482668  |
| H | -44.310005220 | 3.769773386  | 10.520262379 |
| O | -41.967388203 | 2.655689847  | 9.842403114  |
| H | -41.121621408 | 2.535905010  | 9.382716131  |
| C | -43.148000000 | -0.495000000 | 19.676000000 |
| H | -42.112762333 | -0.594078885 | 19.350409511 |
| H | -43.150547290 | -0.495246611 | 20.774838386 |
| C | -43.960876111 | -1.703728519 | 19.209380476 |
| H | -43.577568969 | -2.601455735 | 19.716082311 |
| H | -45.008770060 | -1.585084730 | 19.497329625 |
| O | -43.951818755 | -1.877514623 | 17.789611574 |
| H | -43.032053963 | -2.050150227 | 17.522933250 |
| C | -43.727817694 | 0.842430970  | 19.245974881 |
| O | -44.902117543 | 1.169804646  | 19.491873805 |
| N | -42.860095162 | 1.652429931  | 18.586581496 |
| H | -41.896935708 | 1.336940212  | 18.481651262 |
| C | -43.209000000 | 2.973000000  | 18.111000000 |
| H | -43.817479354 | 3.497151633  | 18.850631399 |
| H | -42.290096102 | 3.552792702  | 17.980037014 |
| C | -43.969215118 | 3.040215606  | 16.788158030 |
| O | -44.637516229 | 4.052604815  | 16.505876172 |



|   |               |              |              |
|---|---------------|--------------|--------------|
| N | -43.802759374 | 1.984119768  | 15.976669105 |
| H | -43.272763200 | 1.201880855  | 16.338203360 |
| C | -44.412000000 | 1.890000000  | 14.669000000 |
| H | -44.456953963 | 2.901629309  | 14.255363888 |
| H | -45.451011510 | 1.547114749  | 14.754172554 |
| C | -43.666792714 | 0.984067056  | 13.686253794 |
| H | -44.051147300 | 1.215431899  | 12.688963151 |
| H | -42.597188255 | 1.213408081  | 13.675821188 |
| C | -43.931695949 | -0.506190208 | 13.885594909 |
| O | -45.071920093 | -0.978143415 | 13.728949479 |
| N | -42.875949124 | -1.274955825 | 14.216897814 |
| H | -43.012095720 | -2.264910031 | 14.364530912 |
| H | -41.958286875 | -0.899101890 | 14.397223908 |
| C | -41.764000000 | -6.382000000 | 14.826000000 |
| H | -41.038411061 | -7.060668909 | 14.358903444 |
| H | -42.727661375 | -6.901576407 | 14.878812614 |
| H | -41.878036859 | -5.505781954 | 14.176998426 |
| C | -41.286981805 | -5.978413546 | 16.208769744 |
| H | -41.167445548 | -6.869338105 | 16.840496043 |
| H | -40.307858492 | -5.491787940 | 16.145344724 |
| O | -42.227295547 | -5.090726991 | 16.849183863 |
| H | -41.793649617 | -4.217515048 | 16.947707587 |
| O | -38.574766715 | 4.081324893  | 15.182150769 |
| H | -37.690840095 | 4.357600715  | 14.869087707 |
| H | -38.378940704 | 3.336680097  | 15.774834775 |
| O | -42.591398724 | -0.333218182 | 10.532027101 |
| H | -42.454495411 | 0.604743848  | 10.310196876 |
| H | -41.691883743 | -0.690767447 | 10.477545074 |
| O | -44.203415366 | -6.248964899 | 18.526059818 |
| H | -43.517439616 | -5.791243699 | 17.989821956 |
| H | -44.688304349 | -5.527596517 | 18.953867095 |
| H | -36.475677220 | 4.443570223  | 12.566154683 |
| H | -40.284607425 | 1.579475427  | 15.319808690 |
| H | -36.288733490 | 2.071264930  | 12.050728959 |

**Text S5.** Coordinate file (xyz format) for the lowest-energy RO<sup>HP</sup>-E<sup>H</sup> state as computed from a DFT/SCRF single point energy calculation following geometry optimization of the active site quantum cluster at the OLYP/TZP level of theory. This low-energy state corresponds to a BS state where Fe1, Fe2, Fe3 and Fe4 (as numbered in Fig. 2B) have net spins of  $\alpha$ ,  $\beta$ ,  $\beta$  and  $\alpha$ , respectively.

204

0.0000

|    |               |              |              |
|----|---------------|--------------|--------------|
| Fe | -36.980822900 | -0.236467879 | 10.706553391 |
| Fe | -37.996690611 | -2.401698913 | 9.495425988  |
| Fe | -37.940497617 | 0.110933481  | 8.268496578  |
| Fe | -35.641904357 | -1.287093905 | 8.682488557  |
| S  | -39.102379519 | -0.468616026 | 10.172590943 |
| S  | -36.140359744 | -2.358037792 | 10.686101335 |
| S  | -36.009121327 | 0.984446053  | 8.991696241  |
| S  | -37.279928868 | -1.937939171 | 7.297999360  |
| S  | -39.135325861 | -4.309858617 | 9.885273543  |
| C  | -40.433916276 | -4.518589601 | 8.604783267  |
| H  | -40.087000000 | -5.237000000 | 7.860000000  |
| H  | -41.336541126 | -4.904765673 | 9.085404530  |
| H  | -40.667003728 | -3.570290565 | 8.117137292  |
| S  | -33.390186799 | -1.655756893 | 8.438403585  |
| C  | -32.787682964 | -1.196123089 | 10.118544514 |
| H  | -31.801000000 | -1.623000000 | 10.285000000 |
| H  | -32.733258429 | -0.109404664 | 10.224236916 |
| H  | -33.455772346 | -1.604694856 | 10.876304468 |
| S  | -39.354292203 | 1.478895243  | 7.126496821  |
| C  | -38.266344028 | 2.778012451  | 6.409438865  |
| H  | -38.869000000 | 3.673000000  | 6.263000000  |
| H  | -37.448928533 | 3.011372332  | 7.091680634  |
| H  | -37.859602845 | 2.448454025  | 5.450872822  |
| O  | -36.109658225 | 1.033347104  | 12.297648419 |
| C  | -36.493542504 | 0.727460129  | 13.706554440 |
| H  | -37.409821617 | 1.290093911  | 13.869288311 |
| H  | -35.705553478 | 1.146355940  | 14.340440991 |
| C  | -36.704907822 | -0.742443458 | 13.927435948 |
| C  | -37.981442588 | -1.169154341 | 13.961922453 |
| H  | -38.771797009 | -0.429582370 | 13.844771098 |
| C  | -35.477401995 | -1.604698350 | 14.115752657 |
| H  | -34.640666245 | -1.264651189 | 13.495576616 |

|   |               |              |              |
|---|---------------|--------------|--------------|
| H | -35.131937747 | -1.560208522 | 15.154321937 |
| H | -35.650433794 | -2.651859232 | 13.865214440 |
| C | -38.490481999 | -2.564096436 | 14.157546274 |
| H | -37.754061334 | -3.225027791 | 14.619082660 |
| H | -38.772444373 | -2.992604369 | 13.188837892 |
| O | -39.715326560 | -2.584779023 | 14.930818761 |
| P | -39.663026475 | -2.440562727 | 16.557927147 |
| O | -38.491087190 | -3.275512311 | 17.090180525 |
| O | -41.056751097 | -2.784418924 | 17.029447046 |
| O | -39.223093014 | -0.930138373 | 16.882664380 |
| P | -39.893752115 | 0.644945810  | 16.854028163 |
| O | -38.724240330 | 1.493245430  | 16.385992726 |
| O | -41.145559168 | 0.615143848  | 16.000404694 |
| O | -40.190124234 | 0.867436963  | 18.385395789 |
| C | -35.064000000 | -5.724000000 | 10.267000000 |
| O | -33.942682732 | -6.131501879 | 10.626198296 |
| H | -35.172741802 | -4.820326424 | 9.652245387  |
| N | -36.226171731 | -6.323326015 | 10.552823439 |
| H | -37.104510002 | -5.913824486 | 10.249820690 |
| H | -36.246249658 | -7.166755051 | 11.112301564 |
| C | -37.829965361 | -5.656497462 | 19.815240798 |
| H | -37.105190174 | -5.836716280 | 19.000587657 |
| O | -37.790401041 | -6.330823746 | 20.865521549 |
| N | -38.689482728 | -4.673713426 | 19.522311197 |
| H | -38.631907361 | -4.249619856 | 18.585189642 |
| C | -39.795000000 | -4.261000000 | 20.371000000 |
| H | -39.566977328 | -4.561164423 | 21.396125941 |
| H | -40.697964560 | -4.814434693 | 20.082988173 |
| C | -40.143996433 | -2.774405127 | 20.301873211 |
| H | -40.423007751 | -2.513772230 | 19.280736541 |
| H | -41.048583558 | -2.651176532 | 20.909913615 |
| C | -39.106183101 | -1.821840438 | 20.806586085 |
| N | -38.973162763 | -0.529080039 | 20.319352520 |
| H | -39.494922386 | -0.059149570 | 19.506811791 |
| C | -38.020903353 | 0.102835702  | 21.005546248 |
| H | -37.701541761 | 1.121835643  | 20.857150128 |
| N | -37.533103814 | -0.741490171 | 21.916244925 |
| H | -36.804525679 | -0.520333986 | 22.582520189 |
| C | -38.187091308 | -1.945727602 | 21.818580383 |
| H | -37.948673756 | -2.769992780 | 22.472623474 |
| C | -32.924000000 | 0.447000000  | 16.553000000 |
| H | -32.180370301 | 1.246089934  | 16.456132267 |
| H | -32.400750620 | -0.509493653 | 16.454751588 |
| H | -33.629065353 | 0.537881475  | 15.723805400 |
| C | -33.639511174 | 0.556798367  | 17.910230372 |
| H | -32.903452460 | 0.544646761  | 18.721431271 |

|   |               |              |              |
|---|---------------|--------------|--------------|
| H | -34.168301507 | 1.511868526  | 17.979407866 |
| C | -34.617793060 | -0.552905471 | 18.108227606 |
| N | -34.252385059 | -1.791089152 | 18.602812652 |
| H | -33.349120135 | -2.033448185 | 18.992607378 |
| C | -35.277213139 | -2.644854068 | 18.503430998 |
| H | -35.256275515 | -3.676982678 | 18.813276080 |
| N | -36.301807238 | -1.991579805 | 17.961731823 |
| H | -37.213641315 | -2.442174221 | 17.655782847 |
| C | -35.924347453 | -0.690556142 | 17.714010748 |
| H | -36.606981940 | 0.013688596  | 17.260143851 |
| C | -30.321000000 | 1.083000000  | 7.036000000  |
| H | -29.976749999 | 0.119938881  | 7.452744655  |
| O | -29.515712342 | 1.910325865  | 6.570589810  |
| N | -31.649184048 | 1.241511196  | 7.097533722  |
| H | -32.240178166 | 0.477579741  | 7.416775056  |
| H | -32.081799786 | 2.067520955  | 6.702847657  |
| C | -36.911000000 | 6.089000000  | 22.221000000 |
| H | -36.794612083 | 7.025603612  | 22.779547026 |
| H | -37.270333154 | 5.323373794  | 22.918952015 |
| H | -35.920765497 | 5.784890699  | 21.868547436 |
| C | -37.887556830 | 6.276147956  | 21.053648752 |
| H | -38.859980798 | 6.606827547  | 21.435469710 |
| H | -37.517702985 | 7.082754270  | 20.405634464 |
| C | -38.087186055 | 5.038424224  | 20.231250527 |
| N | -37.062869185 | 4.479102982  | 19.486814406 |
| C | -37.589913222 | 3.414926057  | 18.896234277 |
| H | -37.088891718 | 2.753107070  | 18.205422120 |
| N | -38.889627282 | 3.249337088  | 19.221269248 |
| H | -39.472189662 | 2.466182707  | 18.881896206 |
| C | -39.228000714 | 4.276664997  | 20.073421594 |
| H | -40.223297790 | 4.379073925  | 20.485252418 |
| C | -33.593000000 | 4.997000000  | 17.938000000 |
| H | -32.697247779 | 4.421033790  | 17.681694110 |
| H | -33.244064440 | 6.014239230  | 18.167166297 |
| N | -34.175910620 | 4.415684576  | 19.140993201 |
| H | -35.196969862 | 4.510551151  | 19.296520818 |
| C | -33.445430390 | 3.941390535  | 20.156880724 |
| H | -34.068025166 | 3.595403457  | 21.000722650 |
| O | -32.200143304 | 3.858138779  | 20.205470030 |
| C | -34.543099214 | 5.044395403  | 16.749312413 |
| H | -34.801288717 | 4.028381972  | 16.434722367 |
| H | -35.478136466 | 5.541121610  | 17.029504145 |
| C | -33.881043129 | 5.806746750  | 15.598636392 |
| H | -32.895937215 | 5.370691736  | 15.373066015 |
| H | -33.689276458 | 6.848000004  | 15.874676197 |
| C | -34.607303972 | 5.822673578  | 14.273848707 |

|   |               |              |              |
|---|---------------|--------------|--------------|
| O | -34.426504024 | 6.688314186  | 13.419715112 |
| O | -35.424904088 | 4.773481299  | 14.103479190 |
| C | -37.942000000 | 5.930000000  | 10.930000000 |
| H | -38.261055754 | 6.461975131  | 10.027077675 |
| H | -38.829915738 | 5.520331380  | 11.422077055 |
| H | -37.473561955 | 6.657866615  | 11.602906451 |
| C | -36.974323641 | 4.814814764  | 10.571030881 |
| H | -37.496949297 | 4.082693347  | 9.942522081  |
| C | -35.716364505 | 5.286007508  | 9.845639616  |
| H | -35.048235078 | 4.442289272  | 9.638488711  |
| H | -35.981729460 | 5.746019602  | 8.886167946  |
| H | -35.169421508 | 6.023643892  | 10.442269461 |
| O | -36.639371086 | 4.142134275  | 11.821427804 |
| C | -43.705995794 | 0.853017254  | 6.210402210  |
| H | -42.999378886 | 0.315951583  | 5.553061256  |
| O | -44.938916666 | 0.762654574  | 6.054386207  |
| N | -43.081689272 | 1.583990092  | 7.146115462  |
| H | -42.067076045 | 1.532017723  | 7.151140676  |
| C | -43.747000000 | 2.383000000  | 8.174000000  |
| H | -44.532889896 | 2.975498980  | 7.694102325  |
| H | -44.234748401 | 1.722338664  | 8.901463920  |
| C | -42.774057690 | 3.319215124  | 8.894963082  |
| H | -42.246746241 | 3.924832886  | 8.144841782  |
| C | -43.513325720 | 4.251674422  | 9.846217093  |
| H | -42.800803758 | 4.914405135  | 10.345857925 |
| H | -44.234824679 | 4.866785182  | 9.298279153  |
| H | -44.054184079 | 3.685030856  | 10.612835130 |
| O | -41.804579788 | 2.560244027  | 9.654216565  |
| H | -41.010492093 | 2.440026877  | 9.104339230  |
| C | -43.148000000 | -0.495000000 | 19.676000000 |
| H | -42.124279838 | -0.586501115 | 19.315726593 |
| H | -43.109994329 | -0.476576897 | 20.774925806 |
| C | -43.959539580 | -1.724978863 | 19.269928677 |
| H | -43.569148100 | -2.596683816 | 19.815475128 |
| H | -45.005725895 | -1.598188868 | 19.562692441 |
| O | -43.965453564 | -1.976210827 | 17.861607983 |
| H | -43.043546284 | -2.120999919 | 17.580204370 |
| C | -43.744238350 | 0.841428276  | 19.242418941 |
| O | -44.943662197 | 1.131553396  | 19.445154991 |
| N | -42.858060432 | 1.684857877  | 18.674846754 |
| H | -41.898747030 | 1.341498010  | 18.522636940 |
| C | -43.209000000 | 2.973000000  | 18.111000000 |
| H | -43.764330843 | 3.575186321  | 18.833253562 |
| H | -42.281596594 | 3.504840177  | 17.879110612 |
| C | -44.068925287 | 2.915891416  | 16.842093920 |
| O | -45.036953084 | 3.698118232  | 16.700277044 |

|   |               |              |              |
|---|---------------|--------------|--------------|
| N | -43.699206630 | 2.012801719  | 15.928047809 |
| H | -42.825223919 | 1.487005145  | 16.063680837 |
| C | -44.412000000 | 1.890000000  | 14.669000000 |
| H | -44.493945761 | 2.884665269  | 14.213682238 |
| H | -45.440433169 | 1.556307728  | 14.855300749 |
| C | -43.740833635 | 0.959098218  | 13.658767903 |
| H | -44.193681548 | 1.163486080  | 12.685861088 |
| H | -42.674162762 | 1.185471615  | 13.580591208 |
| C | -43.971780170 | -0.526457921 | 13.919275800 |
| O | -45.068074121 | -1.063386388 | 13.642660968 |
| N | -42.930335377 | -1.208794324 | 14.418039087 |
| H | -43.067879528 | -2.174228641 | 14.681116005 |
| H | -42.139981261 | -0.718727549 | 14.834070725 |
| C | -41.764000000 | -6.382000000 | 14.826000000 |
| H | -41.142438742 | -7.088692670 | 14.259998830 |
| H | -42.794412887 | -6.755869952 | 14.821591937 |
| H | -41.738516576 | -5.417894881 | 14.305451327 |
| C | -41.238166933 | -6.252486325 | 16.248504481 |
| H | -41.236112413 | -7.234675817 | 16.736641412 |
| H | -40.202769220 | -5.890463533 | 16.236812602 |
| O | -42.045117008 | -5.383569460 | 17.059433231 |
| H | -41.670184945 | -4.470870539 | 17.008931019 |
| O | -38.865631213 | 3.904744885  | 15.105405762 |
| H | -37.962828211 | 4.005624548  | 14.778728390 |
| H | -38.862372170 | 3.020591876  | 15.560698602 |
| O | -42.626748874 | -0.264098081 | 10.547507849 |
| H | -42.366408539 | 0.636084334  | 10.279612252 |
| H | -41.770377226 | -0.688823223 | 10.704464149 |
| O | -43.600912394 | -6.339280872 | 19.170516991 |
| H | -43.057147615 | -5.959814558 | 18.440183162 |
| H | -44.495844584 | -6.019958950 | 18.978131127 |
| H | -36.371259373 | 3.232125307  | 11.623593019 |
| H | -35.148447038 | 0.922159551  | 12.223796480 |
| H | -35.796985332 | 4.758588663  | 13.175535258 |

**Text S6.** Coordinate file (xyz format) for the RO<sup>H</sup>P<sup>H</sup>E<sup>H</sup> state as computed from a DFT/SCRF single point energy calculation following geometry optimization of the active site quantum cluster at the OLYP/TZP level of theory. This low-energy state corresponds to a BS state where Fe1, Fe2, Fe3 and Fe4 (as numbered in Fig. 2B) have net spins of  $\beta$ ,  $\alpha$ ,  $\alpha$  and  $\beta$ , respectively.

205

0.0000

|    |               |              |              |
|----|---------------|--------------|--------------|
| Fe | -36.925580246 | -0.230899110 | 10.726973829 |
| Fe | -37.987005153 | -2.385942414 | 9.512923533  |
| Fe | -37.936031400 | 0.140850107  | 8.314890573  |
| Fe | -35.635608977 | -1.273005193 | 8.684626680  |
| S  | -39.067834723 | -0.448595821 | 10.234454084 |
| S  | -36.112597185 | -2.360909872 | 10.683091169 |
| S  | -35.989881616 | 1.002609178  | 9.007959788  |
| S  | -37.297666581 | -1.899791912 | 7.316253906  |
| S  | -39.152403506 | -4.283911807 | 9.876759289  |
| C  | -40.424879138 | -4.477754802 | 8.567598825  |
| H  | -40.087000000 | -5.237000000 | 7.860000000  |
| H  | -41.357449410 | -4.806589839 | 9.033312637  |
| H  | -40.600008251 | -3.538798547 | 8.039621699  |
| S  | -33.388873528 | -1.642204737 | 8.434608751  |
| C  | -32.796653020 | -1.214599279 | 10.127288222 |
| H  | -31.801000000 | -1.623000000 | 10.285000000 |
| H  | -32.766479595 | -0.130009379 | 10.261978148 |
| H  | -33.458256915 | -1.657747210 | 10.871500253 |
| S  | -39.363384138 | 1.528842747  | 7.221851389  |
| C  | -38.266472984 | 2.788107451  | 6.455038408  |
| H  | -38.869000000 | 3.673000000  | 6.263000000  |
| H  | -37.455064938 | 3.054196726  | 7.132516784  |
| H  | -37.852815277 | 2.412681305  | 5.516646413  |
| O  | -35.956902675 | 1.063766574  | 12.296897157 |
| C  | -36.364967232 | 0.771258122  | 13.689500257 |
| H  | -37.268782066 | 1.358155102  | 13.835948823 |
| H  | -35.586815922 | 1.166742205  | 14.348253925 |
| C  | -36.619693274 | -0.696868130 | 13.898789291 |
| C  | -37.903363962 | -1.101058339 | 13.864348419 |
| H  | -38.672842952 | -0.346339476 | 13.707933127 |
| C  | -35.420555301 | -1.585888021 | 14.121755973 |
| H  | -34.559853654 | -1.259144374 | 13.528244727 |

|   |               |              |              |
|---|---------------|--------------|--------------|
| H | -35.105119059 | -1.550704181 | 15.169651131 |
| H | -35.608959824 | -2.627733464 | 13.862447159 |
| C | -38.450661890 | -2.483998581 | 14.028324766 |
| H | -37.729975089 | -3.186773699 | 14.447810989 |
| H | -38.791953995 | -2.871067227 | 13.062960001 |
| O | -39.655291865 | -2.476147336 | 14.852223680 |
| P | -39.545158611 | -2.407336472 | 16.472227715 |
| O | -38.425474351 | -3.295104708 | 16.982079525 |
| O | -40.950330676 | -2.573202819 | 16.981411381 |
| O | -38.963373640 | -0.891407531 | 16.777113398 |
| P | -39.414714810 | 0.659922870  | 16.951873689 |
| O | -38.232160088 | 1.508813080  | 16.584594164 |
| O | -40.614133864 | 0.853730048  | 15.854398046 |
| O | -40.022952328 | 0.802542171  | 18.344924272 |
| C | -35.064000000 | -5.724000000 | 10.267000000 |
| O | -33.959606494 | -6.121998353 | 10.683561137 |
| H | -35.144140019 | -4.844360372 | 9.613430377  |
| N | -36.239681031 | -6.307716259 | 10.529380142 |
| H | -37.106208674 | -5.897413397 | 10.195323769 |
| H | -36.286446104 | -7.123162175 | 11.127407222 |
| C | -37.835196810 | -5.688715823 | 19.855429647 |
| H | -37.114165941 | -5.895773911 | 19.044304755 |
| O | -37.809626355 | -6.333195932 | 20.920297860 |
| N | -38.683633633 | -4.696635323 | 19.539627450 |
| H | -38.624504254 | -4.315709009 | 18.593006269 |
| C | -39.795000000 | -4.261000000 | 20.371000000 |
| H | -39.606113324 | -4.602553053 | 21.390205980 |
| H | -40.712278321 | -4.766040902 | 20.043743475 |
| C | -40.070823250 | -2.760695064 | 20.342402978 |
| H | -40.291918858 | -2.446510049 | 19.320858518 |
| H | -40.991516893 | -2.609365767 | 20.919246298 |
| C | -39.006457985 | -1.886578799 | 20.922780401 |
| N | -38.818134847 | -0.579497771 | 20.502601783 |
| H | -39.304675916 | -0.108378618 | 19.715368585 |
| C | -37.863283553 | -0.000706496 | 21.234426351 |
| H | -37.519642275 | 1.017613067  | 21.146513135 |
| N | -37.427472990 | -0.903002150 | 22.111652719 |
| H | -36.711987874 | -0.734834532 | 22.807808915 |
| C | -38.114847086 | -2.081812957 | 21.946483040 |
| H | -37.915225974 | -2.940519848 | 22.568014971 |
| C | -32.924000000 | 0.447000000  | 16.553000000 |
| H | -32.192956834 | 1.253588362  | 16.429448625 |
| H | -32.404813857 | -0.503630330 | 16.396550256 |
| H | -33.682495940 | 0.555921185  | 15.775434665 |
| C | -33.551594603 | 0.517638898  | 17.956290129 |
| H | -32.769480724 | 0.493297295  | 18.722539844 |



|   |               |              |              |
|---|---------------|--------------|--------------|
| H | -34.083708609 | 1.465894818  | 18.080246615 |
| C | -34.510675180 | -0.604189339 | 18.180013537 |
| N | -34.153930726 | -1.819410458 | 18.734288158 |
| H | -33.259988040 | -2.043389017 | 19.155959509 |
| C | -35.163808968 | -2.688566498 | 18.633360553 |
| H | -35.145863318 | -3.709064730 | 18.979783166 |
| N | -36.174772773 | -2.062011314 | 18.033918794 |
| H | -37.057263874 | -2.512002630 | 17.708732562 |
| C | -35.800924698 | -0.767311590 | 17.750260476 |
| H | -36.465473949 | -0.079750391 | 17.250129629 |
| C | -30.321000000 | 1.083000000  | 7.036000000  |
| H | -29.990797267 | 0.103215674  | 7.424468363  |
| O | -29.507461612 | 1.905158525  | 6.576466414  |
| N | -31.644562201 | 1.268488899  | 7.124822716  |
| H | -32.245005822 | 0.511222403  | 7.442069568  |
| H | -32.064962793 | 2.114317502  | 6.760024855  |
| C | -36.911000000 | 6.089000000  | 22.221000000 |
| H | -36.725334873 | 6.992756659  | 22.814890926 |
| H | -37.353000319 | 5.337069001  | 22.885306426 |
| H | -35.944273310 | 5.710499278  | 21.878287527 |
| C | -37.838902005 | 6.393939030  | 21.042299872 |
| H | -38.793548661 | 6.790954110  | 21.404036969 |
| H | -37.388977701 | 7.173870745  | 20.413474198 |
| C | -38.087423777 | 5.165073500  | 20.229738738 |
| N | -37.054133949 | 4.518750195  | 19.574723643 |
| C | -37.588221125 | 3.432736634  | 19.042968603 |
| H | -37.079855216 | 2.707915983  | 18.426837182 |
| N | -38.908827133 | 3.339356803  | 19.322454072 |
| H | -39.503241510 | 2.572850600  | 19.011732571 |
| C | -39.248244319 | 4.438104441  | 20.080197442 |
| H | -40.253177999 | 4.598606725  | 20.446169313 |
| C | -33.593000000 | 4.997000000  | 17.938000000 |
| H | -32.721617657 | 4.392318732  | 17.665479885 |
| H | -33.208738974 | 6.004609513  | 18.151884431 |
| N | -34.169917698 | 4.441058508  | 19.157279020 |
| H | -35.184807542 | 4.554800453  | 19.326850751 |
| C | -33.439789124 | 3.957027134  | 20.169821703 |
| H | -34.061904180 | 3.636337004  | 21.024010915 |
| O | -32.197154314 | 3.842717851  | 20.205482621 |
| C | -34.572965400 | 5.060046549  | 16.773928548 |
| H | -34.866840574 | 4.048428930  | 16.476061123 |
| H | -35.486688715 | 5.584032671  | 17.074418297 |
| C | -33.922376620 | 5.794865759  | 15.600510465 |
| H | -32.955710902 | 5.330278395  | 15.353187549 |
| H | -33.694768866 | 6.832561954  | 15.862860109 |
| C | -34.678650241 | 5.823814584  | 14.293646016 |

|   |               |              |              |
|---|---------------|--------------|--------------|
| O | -34.478873135 | 6.669320854  | 13.424670963 |
| O | -35.547259179 | 4.809451098  | 14.152499848 |
| C | -37.942000000 | 5.930000000  | 10.930000000 |
| H | -38.239074044 | 6.470816264  | 10.025140380 |
| H | -38.844870368 | 5.522678727  | 11.397289812 |
| H | -37.486034054 | 6.649901998  | 11.619520507 |
| C | -36.973701046 | 4.814286478  | 10.580931338 |
| H | -37.485699488 | 4.090413545  | 9.934104482  |
| C | -35.700143913 | 5.288847730  | 9.886365972  |
| H | -35.030257859 | 4.446673512  | 9.678513171  |
| H | -35.948696518 | 5.760571978  | 8.928089711  |
| H | -35.161578382 | 6.017898224  | 10.500279536 |
| O | -36.674301143 | 4.126324933  | 11.834394215 |
| C | -43.627932751 | 0.719170373  | 6.331569043  |
| H | -42.901539432 | 0.208564313  | 5.674446078  |
| O | -44.848276705 | 0.486734321  | 6.255377327  |
| N | -43.043198602 | 1.579827464  | 7.176255259  |
| H | -42.029144495 | 1.628963581  | 7.132310211  |
| C | -43.747000000 | 2.383000000  | 8.174000000  |
| H | -44.533596893 | 2.955150697  | 7.669714168  |
| H | -44.239299960 | 1.723842227  | 8.899237808  |
| C | -42.806932796 | 3.347227141  | 8.900370243  |
| H | -42.275478077 | 3.951885596  | 8.152357780  |
| C | -43.583399234 | 4.279169064  | 9.821339453  |
| H | -42.895465705 | 4.962902736  | 10.326830432 |
| H | -44.302980397 | 4.872360207  | 9.247646519  |
| H | -44.132938880 | 3.714039970  | 10.582998946 |
| O | -41.835675462 | 2.620266697  | 9.690626139  |
| H | -41.038721668 | 2.488381931  | 9.146186207  |
| C | -43.148000000 | -0.495000000 | 19.676000000 |
| H | -42.111633593 | -0.583505900 | 19.350538309 |
| H | -43.154916785 | -0.516945554 | 20.774068402 |
| C | -43.954355952 | -1.695522828 | 19.177186044 |
| H | -43.575567926 | -2.605455028 | 19.662277056 |
| H | -45.004667556 | -1.584309554 | 19.458896802 |
| O | -43.931681185 | -1.832236492 | 17.751480195 |
| H | -43.018144760 | -2.039939479 | 17.488774220 |
| C | -43.732172010 | 0.846482303  | 19.265425549 |
| O | -44.895648263 | 1.180980766  | 19.548520822 |
| N | -42.879272687 | 1.643042022  | 18.569060955 |
| H | -41.925537665 | 1.313890829  | 18.433501938 |
| C | -43.209000000 | 2.973000000  | 18.111000000 |
| H | -43.899295047 | 3.447683767  | 18.811689742 |
| H | -42.300941823 | 3.583126215  | 18.097588209 |
| C | -43.837006557 | 3.092841181  | 16.726247151 |
| O | -44.264743648 | 4.198258333  | 16.343282945 |

|   |               |              |              |
|---|---------------|--------------|--------------|
| N | -43.847610862 | 1.968431097  | 15.995822697 |
| H | -43.529562992 | 1.123687543  | 16.452943479 |
| C | -44.412000000 | 1.890000000  | 14.669000000 |
| H | -44.363999573 | 2.893020898  | 14.239245351 |
| H | -45.475256983 | 1.621954246  | 14.720285874 |
| C | -43.700153421 | 0.916564922  | 13.727520793 |
| H | -44.061464380 | 1.132064298  | 12.717918190 |
| H | -42.621469824 | 1.092346910  | 13.722105923 |
| C | -44.034691651 | -0.552921477 | 13.966769542 |
| O | -45.201089073 | -0.971349735 | 13.852996491 |
| N | -43.005457078 | -1.367744509 | 14.272602637 |
| H | -43.187981044 | -2.344859290 | 14.453480338 |
| H | -42.071095067 | -1.026253077 | 14.437543933 |
| C | -41.764000000 | -6.382000000 | 14.826000000 |
| H | -41.116246776 | -7.111048621 | 14.321670806 |
| H | -42.782829668 | -6.785570119 | 14.840378484 |
| H | -41.762792255 | -5.460121913 | 14.232343450 |
| C | -41.258399618 | -6.132171399 | 16.237595004 |
| H | -41.239203501 | -7.072786243 | 16.800836426 |
| H | -40.233041654 | -5.746409833 | 16.211582183 |
| O | -42.101573801 | -5.220157581 | 16.970767287 |
| H | -41.697480892 | -4.329070316 | 16.930795439 |
| O | -38.994192178 | 3.774808361  | 15.059867249 |
| H | -38.240434668 | 4.148836625  | 14.580296839 |
| H | -38.589831148 | 3.111115683  | 15.658874780 |
| O | -42.561945034 | -0.207072282 | 10.619352696 |
| H | -42.366073715 | 0.699479537  | 10.318094655 |
| H | -41.685428386 | -0.620753566 | 10.608506550 |
| O | -43.722808842 | -6.183389457 | 19.071824691 |
| H | -43.171567687 | -5.805415982 | 18.350392560 |
| H | -44.628482206 | -5.951278256 | 18.814033453 |
| H | -36.301670911 | 3.255964359  | 11.624987658 |
| H | -40.358042464 | 1.588619793  | 15.272017540 |
| H | -34.998314953 | 0.931043991  | 12.231025742 |
| H | -35.897564106 | 4.780746503  | 13.216629730 |
